# Supplementary material
Source: Springer Nature journal article supplement (https://www.springermedizin.de/resource/supplementary/13075_2004_1375_MOESM3_ESM.pdf/9689632)

**(a)**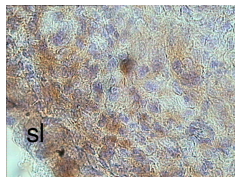**(b)**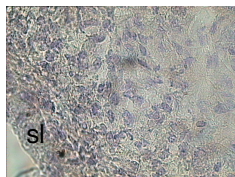

■ WT ZIA  
□ TLR2 -/- ZIA

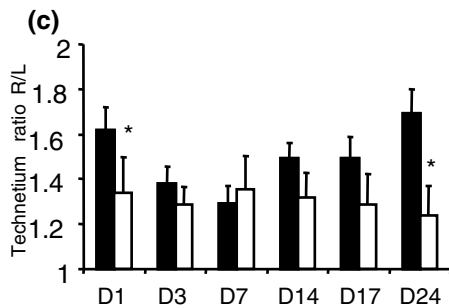**(d)**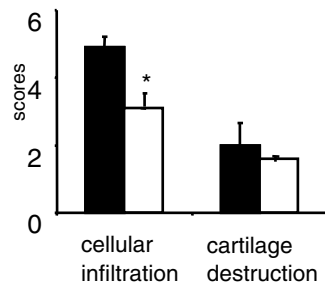**(e)**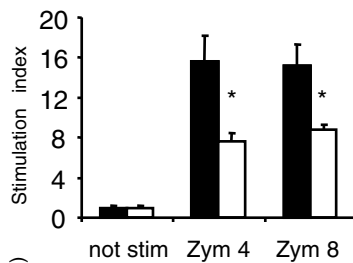**(f)**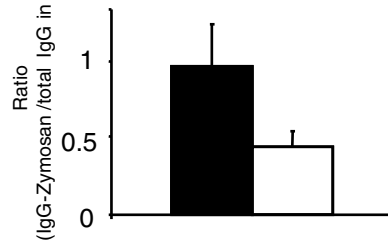

Supplement: MOESM3 [file 9689632]
